# Supplementary material
Source: PubMed Central journal article supplement (PMC4325712)
Supplement: JVI.03398-14_zjv999090138so1.pdf [file JVI.03398-14_zjv999090138so1.pdf]

1 **MOVIE 1. Cat L activity is not detected in endosomes marked with GFP-Rab5.** The movie  
2 shows cat L activity in a BSC-1 cell that was transiently transfected with GFP-Rab5. Images  
3 were acquired at 1 frame every 5 seconds and are shown at 10 frames/sec. The panels  
4 represent: left, merged; center, GFP-Rab5; right, cat L activity.

5

6 **MOVIE 2. Cat L activity is detected in some, but not all, endosomes marked with GFP-**  
7 **Rab7.** The movie shows cat L activity in a BSC-1 cell that was transiently transfected with GFP-  
8 Rab7. Images were acquired at 1 frame every 5 seconds and are shown at 10 frames/sec. The  
9 panels represent: left, merged; center, GFP-Rab7; right, cat L activity.

10

11 **MOVIE 3. Cat L activity is detected in most endosomes marked with NPC1-GFP.** The  
12 movie shows cat L activity in a BSC-1 cell that was transiently transfected with NPC1-GFP.  
13 Images were acquired at 1 frame every 5 seconds and are shown at 10 frames/sec. The panels  
14 represent: left, merged; center, NPC1-GFP; right, cat L activity.

15
